# Supplementary material
Source: Springer Nature journal article supplement (https://www.springermedizin.de/resource/supplementary/12968_2009_960_MOESM3_ESM.pdf/9580050)

## Specificity (95% CI)

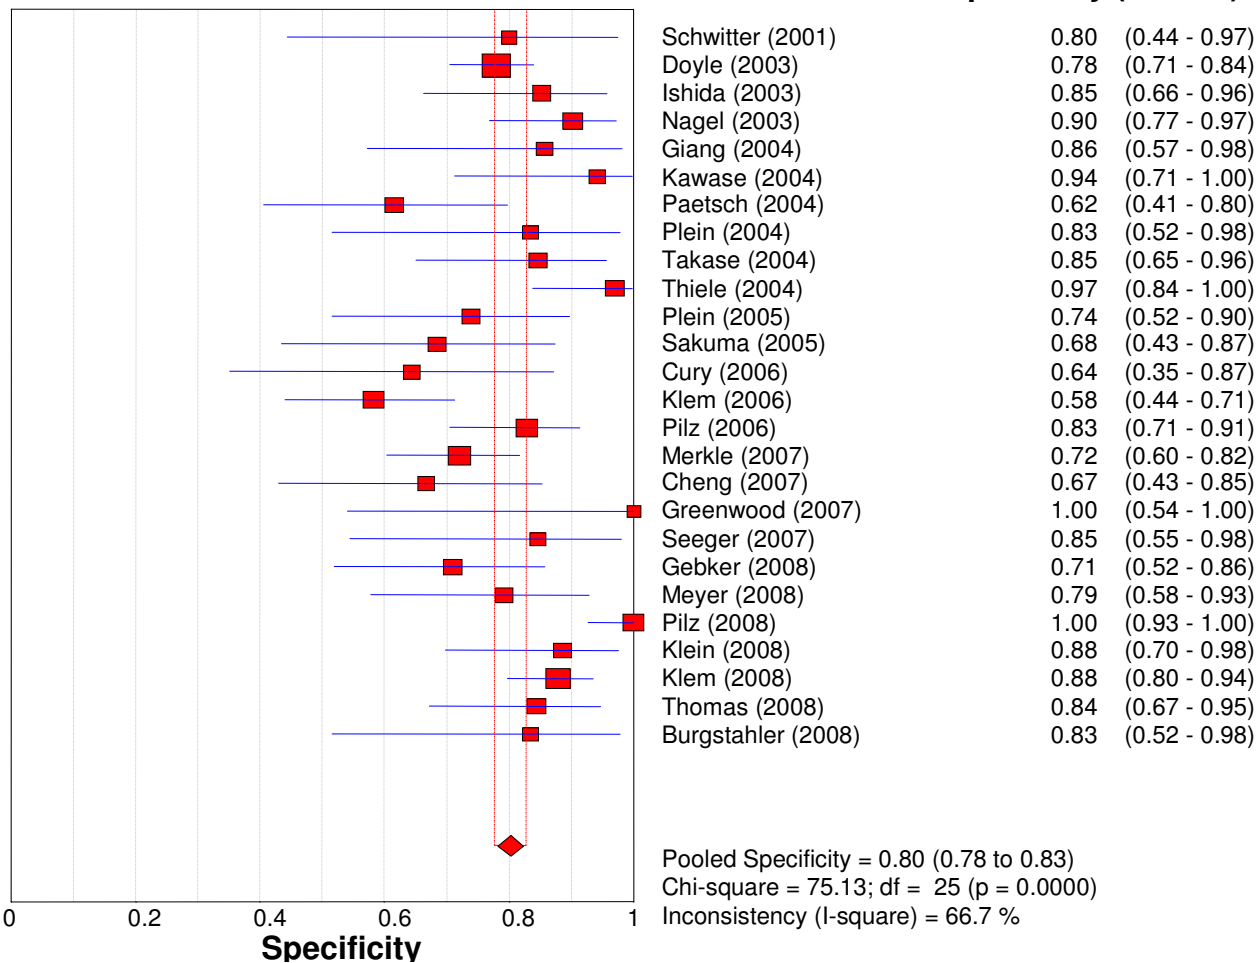

Supplement: MOESM3 [file 9580050]
